# Supplementary material for: Targeting the membrane-proximal C2-set domain of CD33 for improved CAR T cell therapy
Source: PubMed Central journal article supplement — Mol Ther Oncol. 2024 Jul 31;32(3):200854. doi: 10.1016/j.omton.2024.200854 (PMC11367471; doi:10.1016/j.omton.2024.200854), 2024-07-31
Supplement: mmc1.pdf [file mmc1.pdf]

**OMTON, Volume 32**

**Supplemental information**

**Targeting the membrane-proximal C2-set**

**domain of CD33 for improved**

**CAR T cell therapy**

**Salvatore Fiorenza, Sheryl Y.T. Lim, George S. Laszlo, Erik L. Kimble, Tinh-Doan Phi, Margaret C. Lunn-Halbert, Delaney R. Kirchmeier, Jenny Huo, Hans-Peter Kiem, Cameron J. Turtle, and Roland B. Walter**

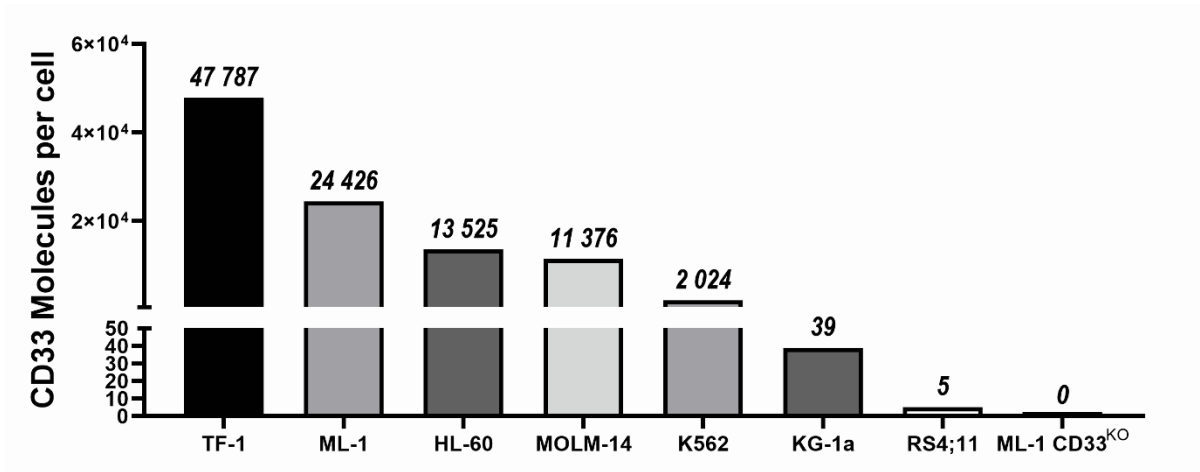

**Figure S1.**

**CD33 molecules expressed on the surface of cell lines.** Number of CD33 surface molecules as quantitated by flow cytometry using Quantibrite-PE.

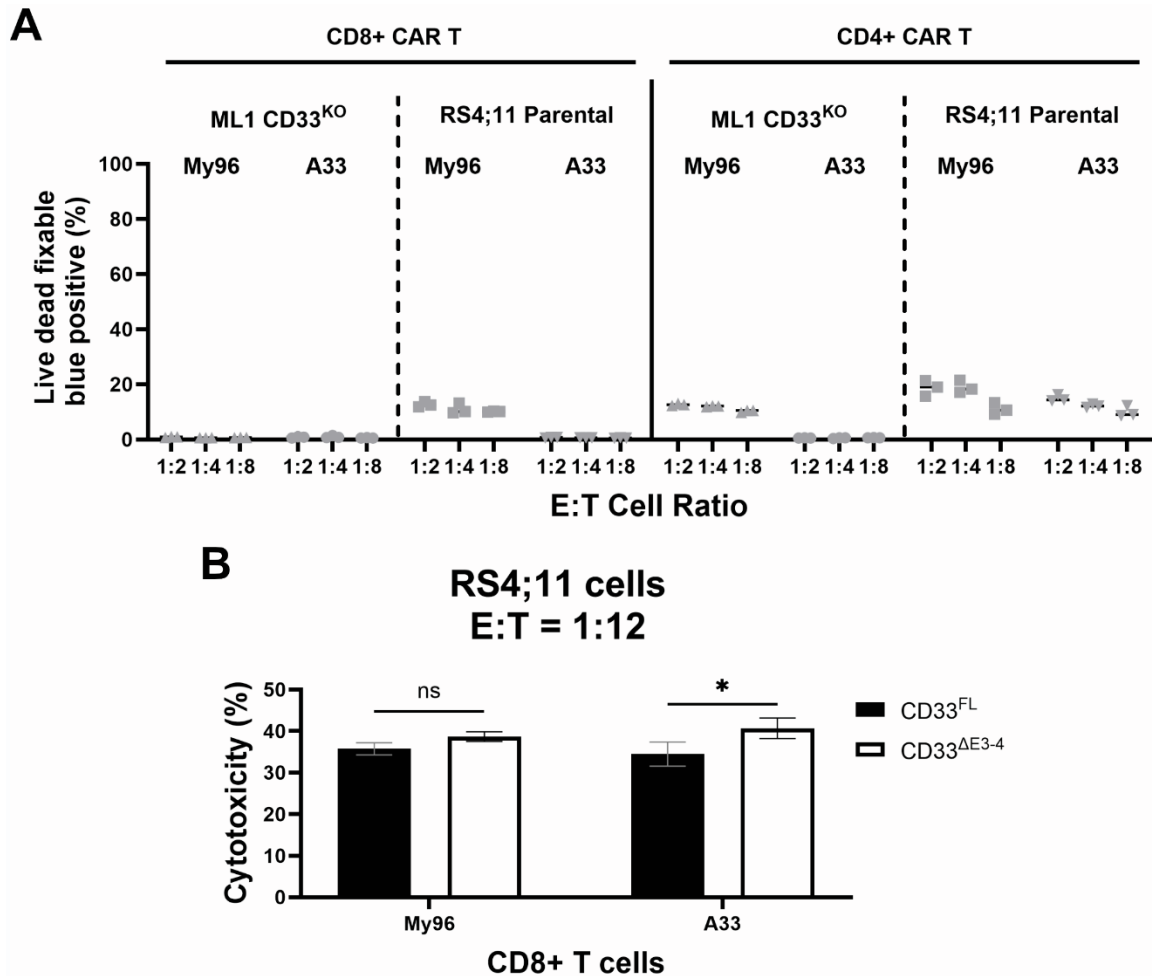

**Figure S2.**

**Cytotoxicity of CD33<sup>V-set</sup> CAR T cells against RS4;11 cells at low antigen expression and low E:T.** (A) Percent positive live dead fixable blue (DAPI) cell parental RS4;11 or ML-1 CD33<sup>KO</sup> when co-cultured with primary human CD8<sup>+</sup> T cells expressing either an My96-based CAR construct or an A33-based CAR construct for 16 hours. Shown are raw individual data points from triplicate experiments. (B) Primary human CD8<sup>+</sup> T cells expressing either an My96-based CAR construct or an A33-based CAR construct were incubated with parental RS4;11 cells or RS4;11 cells transduced with either CD33<sup>FL</sup> or CD33<sup>ΔE3-4</sup> at an effector to target (E:T) cell ratio of 1:12 for 16 hours before flow cytometric assessment of cytotoxicity. Shown are mean  $\pm$  SD of % cytotoxicity relative to parental RS4;11 cells. \* $P < 0.05$ , ns (not significant) by two-way ANOVA with post-hoc Tukey correction. Shown are technical triplicates of one representative experiment.

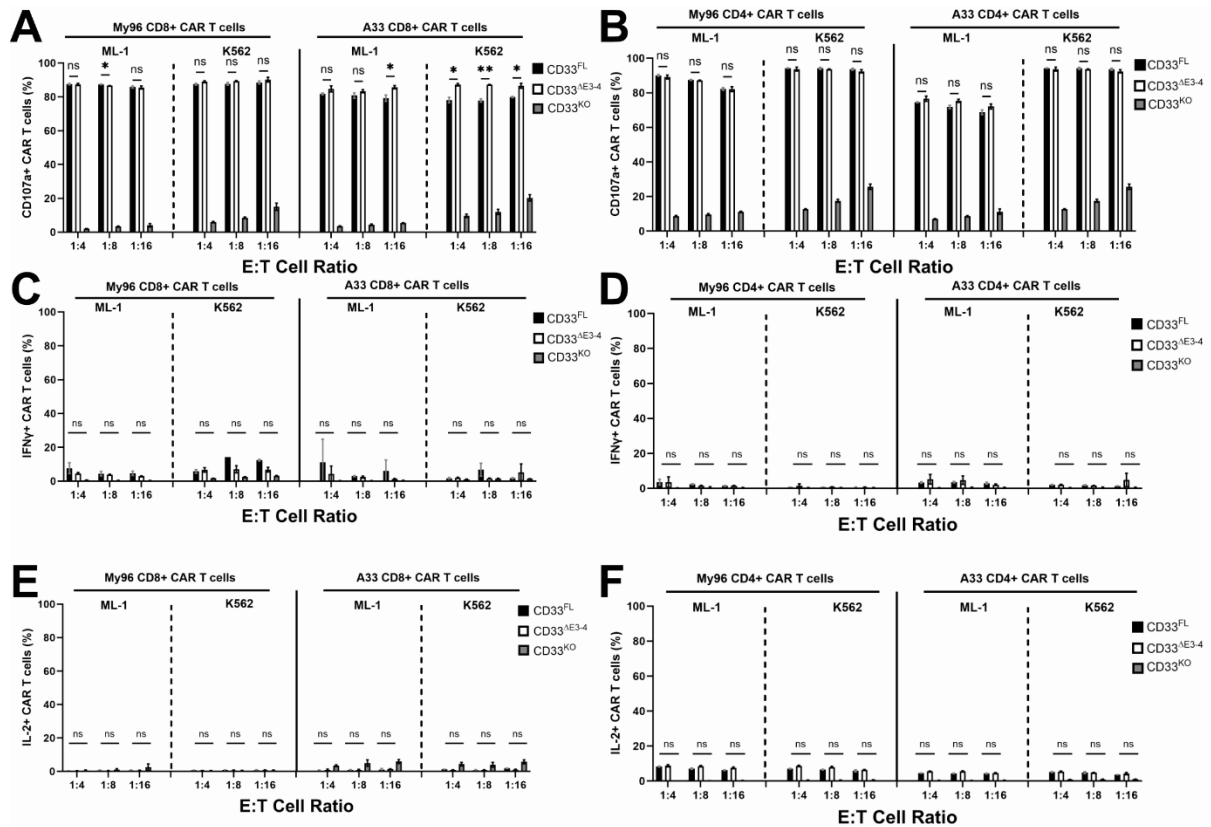

**Figure S3.**

**Degranulation marker and intracellular cytokine production with shorter membrane-membrane distance. (A-B)** CD107a, and **(C-F)** intracellular cytokine staining by multiparameter flow cytometry in **(A, C, E)** CD8+ and **(B, D, F)** CD4+ CD33<sup>V-set</sup> My96 or A33 CAR T cells following 12-20 hours co-culture with ML-1 or K562 cells with CRISPR/Cas9-mediated deletion of the endogenous CD33 locus (C33<sup>KO</sup>) or sublimes engineered to overexpress full length CD33 (FL) or CD33 without the C2-set domain (CD33<sup>ΔE3-4</sup>) via lentiviral gene transfer at various effector to target (E:T) cell ratios as indicated. Shown are mean  $\pm$  SD in triplicate from two representative experiments. \* $P$ <0.05, \*\* $P$ <0.01, ns (not significant) by two-way ANOVA with post-hoc Tukey correction.

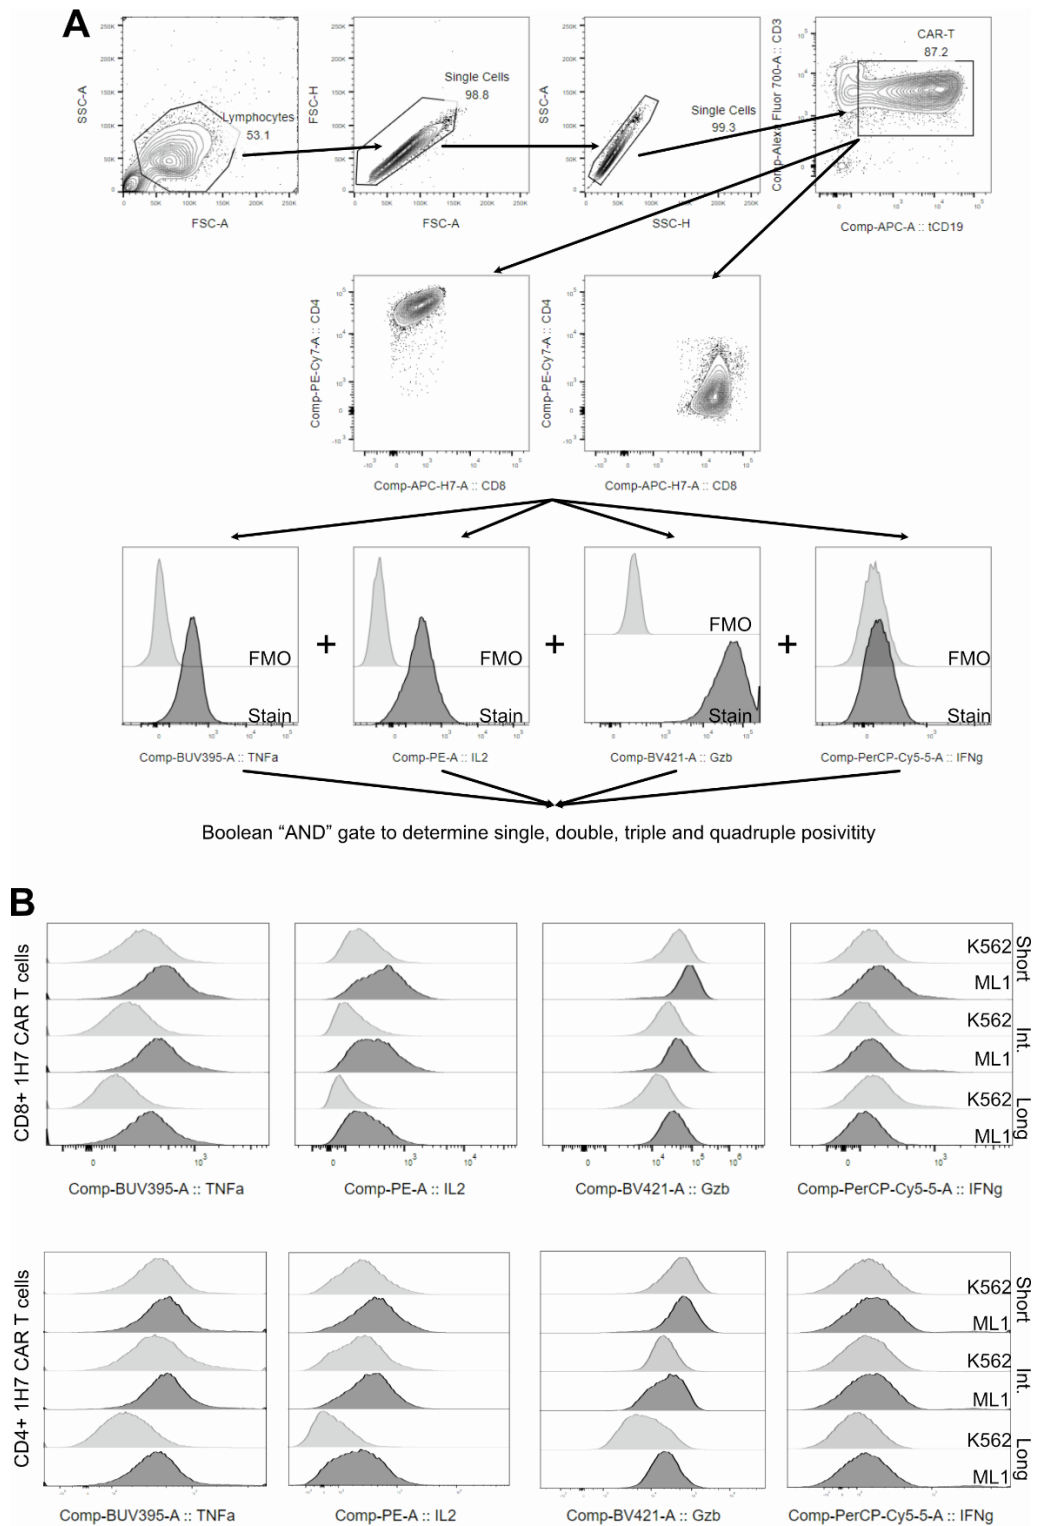

**Figure S4.**

**Flow cytometric analysis of intracellular cytokine expression. (A)** Gating strategy for assessment of polyfunctionality. **(B)** Representative flow cytometry histogram plots of intracellular cytokine expression in CD8+ and CD4+ 1H7 CAR T cells with varying spacer lengths co-cultured with K562 and ML-1 AML cells.

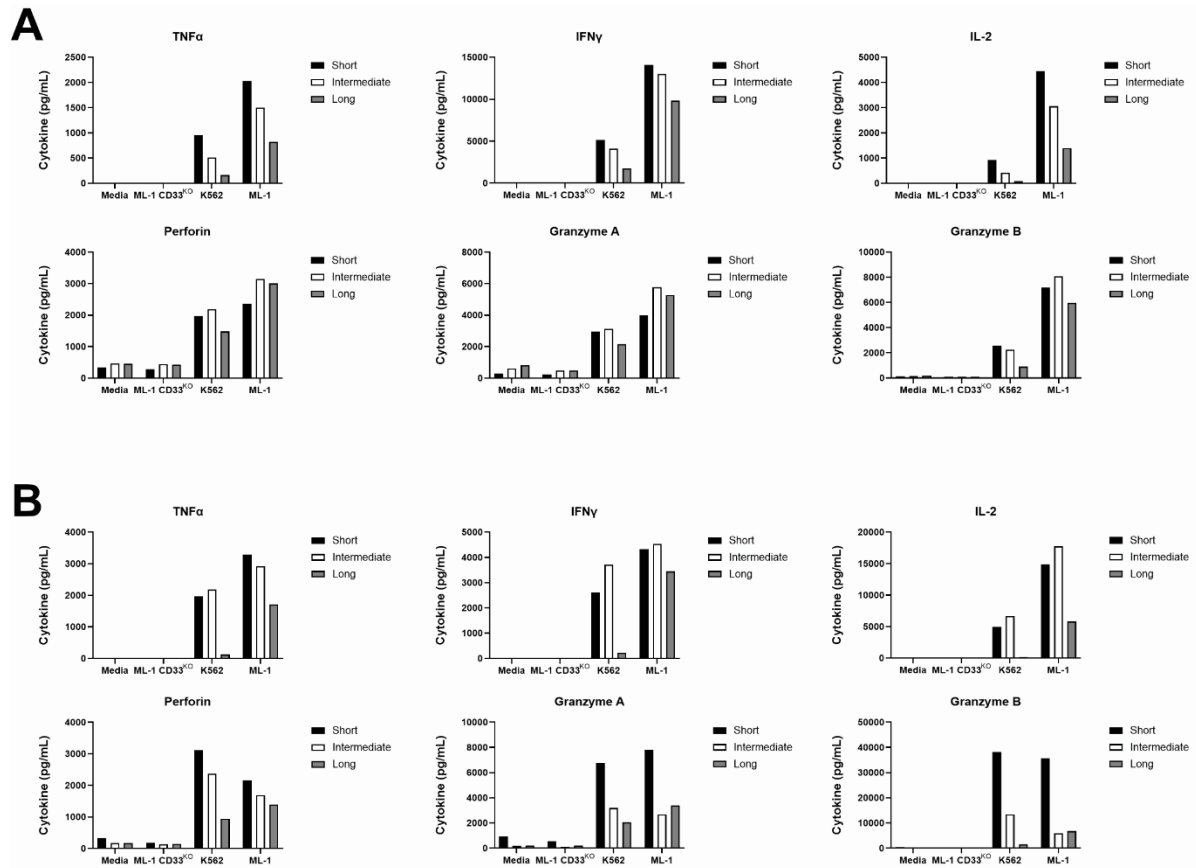

**Figure S5.**

**Effect of spacer length on CAR T cell-induced production of cytokines, perforin, granzyme A, and granzyme B.** Cytokine secretion following 24-hour co-culture of AML cell lines with (A) CD8<sup>+</sup> CD33<sup>PAN</sup> 1H7 CAR T cells and (B) CD4<sup>+</sup> CD33<sup>PAN</sup> 1H7 CAR T cells with different spacer lengths. Shown are mean cytokine concentration in duplicate.

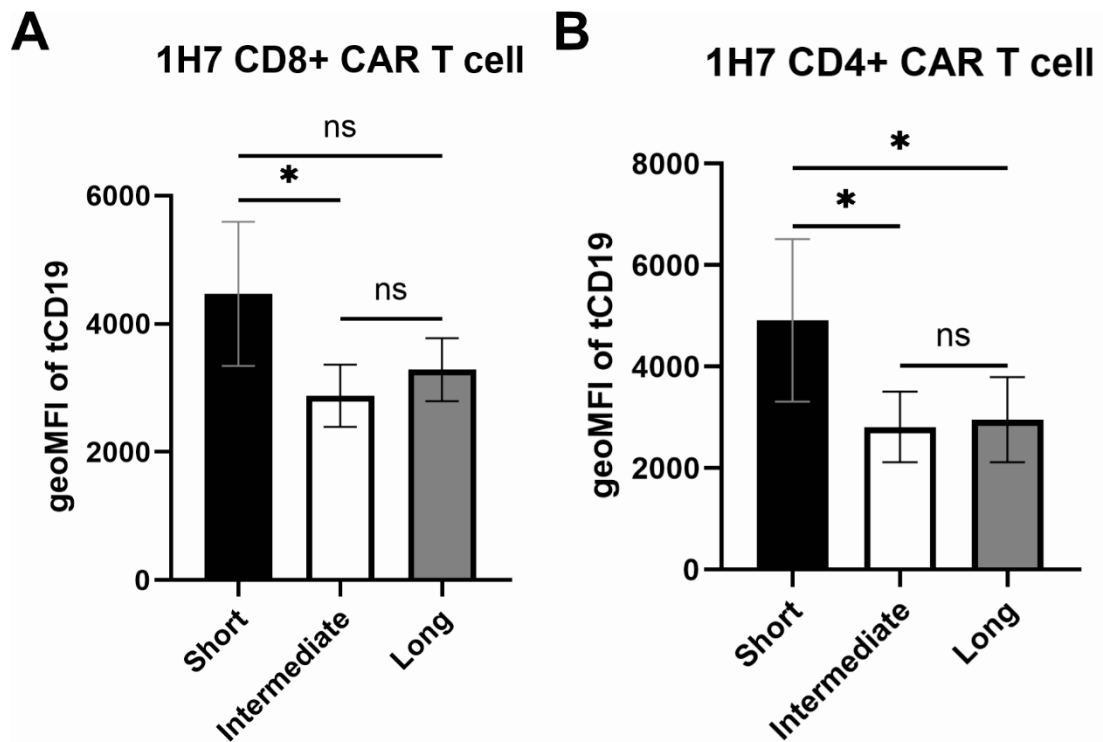

**Figure S6.**

Transgene expression of surface transduction marker molecules (tCD19) on 1H7 CD33<sup>PAN</sup> (A) CD8+ and (B) CD4+ CAR T cells. Shown are mean  $\pm$  SD values from technical triplicates. \* $P$ <0.05, ns (not significant) by two-way ANOVA with post-hoc Tukey correction.

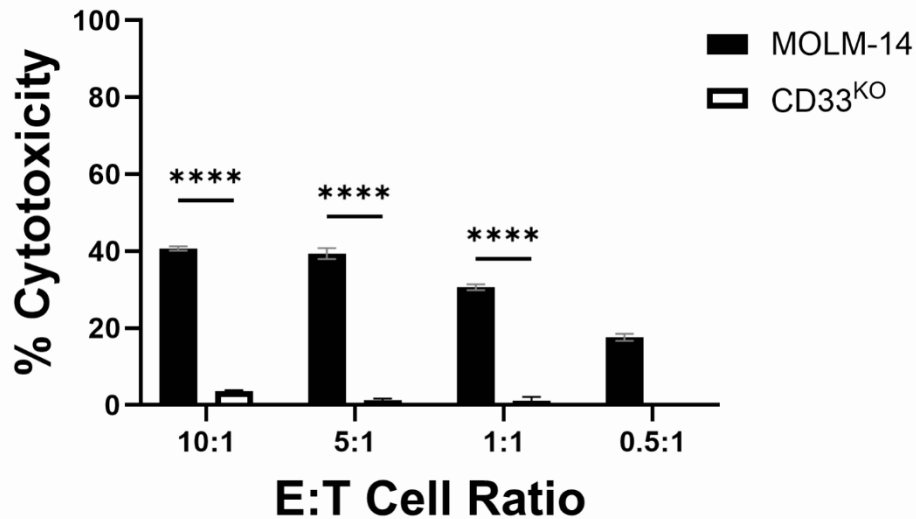

**Figure S7.**

**Cytotoxicity of 1H7 CAR T cells following co-culture with parental MOLM-14 or CD33<sup>KO</sup> cells.** Primary human CD8<sup>+</sup> T cells 1HY.int CAR construct were incubated with chromium<sup>51</sup>-labelled parental MOLM-14 cells or CD33<sup>KO</sup> at decreasing effector to target (E:T) cell ratios for four hours. Chromium within supernatant was then assessed by scintillation counting and calculated as per Materials and Methods. Shown are mean  $\pm$  SD of calculated % cytotoxicity. \*\*\*\* $P < 0.0001$ , by two-way ANOVA with post-hoc Tukey correction. Shown are technical triplicates of one representative experiment.



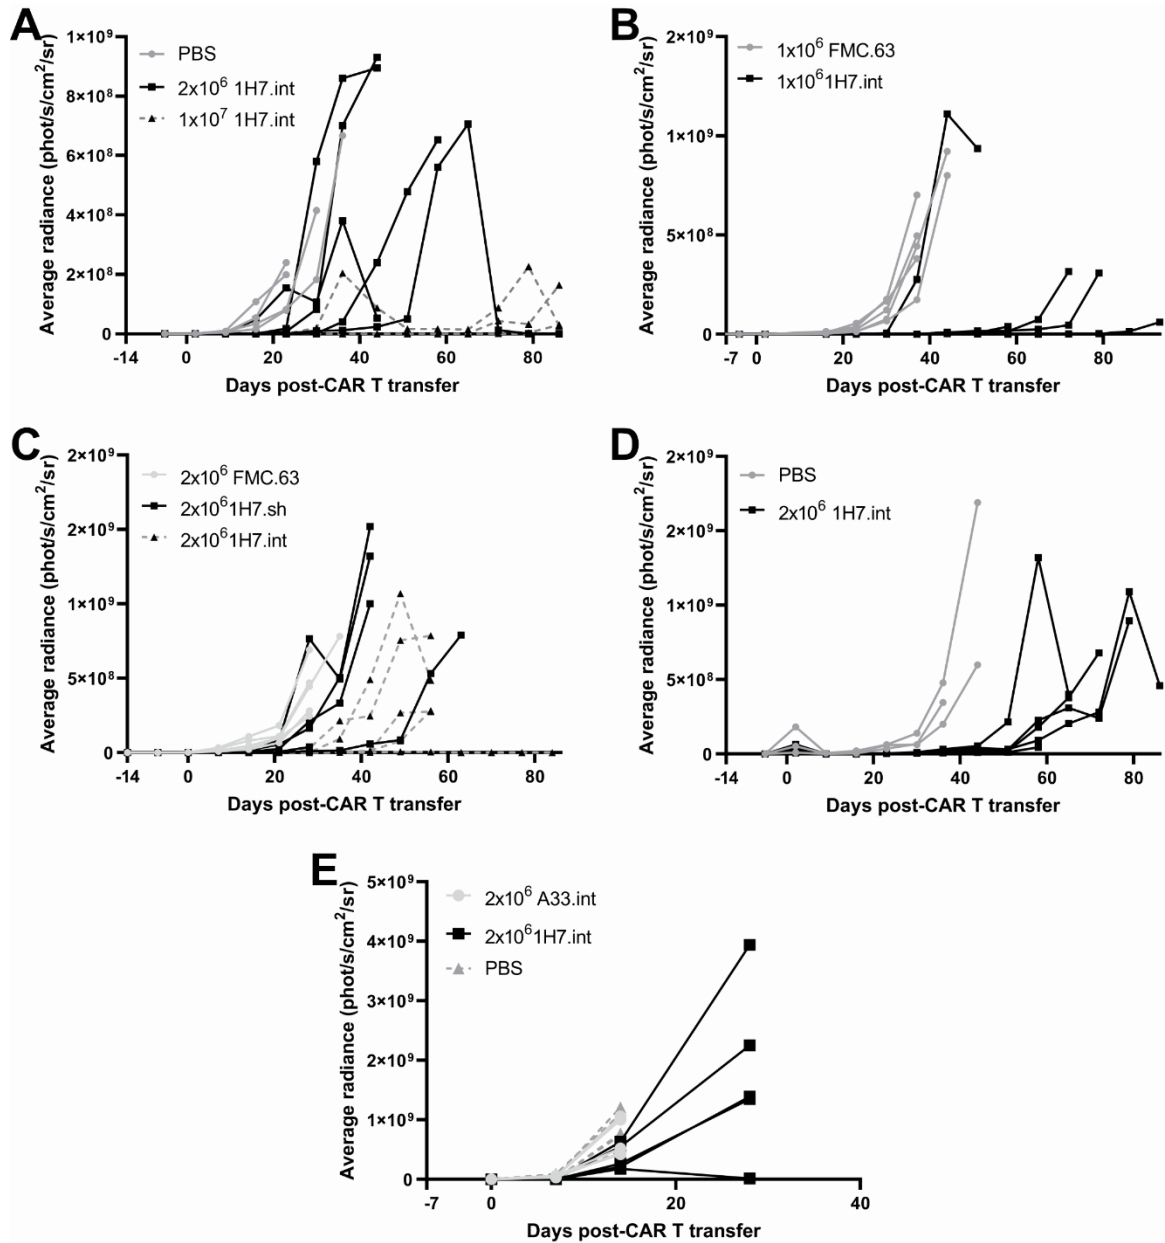

**Figure S8.**

**Bioluminescence of NSG mice bearing human AML cell line derived xenografts.**

Immunodeficient NSG mice were injected with GFP-expressing 2x10<sup>6</sup> HL-60 (**A**), 1x10<sup>6</sup> HL-60 (**B**), 2x10<sup>6</sup> HL-60 (**C**), 2x10<sup>6</sup> KG-1a (**D**) or 5x10<sup>5</sup> MOLM-14 cells (**E**). Two weeks (**A,C** and **D**) or one week (**B** and **E**) later, mice received either 1H7 CD33<sup>PAN</sup> CAR T cells with an intermediate (int) or short (sh) spacer (n=5), A33 CAR T cells (n=5) or CD19-directed CAR T (FMC63, n=5) in a 1:1 ratio of CD4:CD8 T cells or were given vehicle control (PBS, n=4 for HL-60, n=3 for KG-1a, n=5 for MOLM-14). Mice were monitored weekly for bioluminescence by anaesthetization and intraperitoneal injection of luciferin followed by imaging. Note: that if animals were deemed too unwell for anaesthetization they were not imaged.

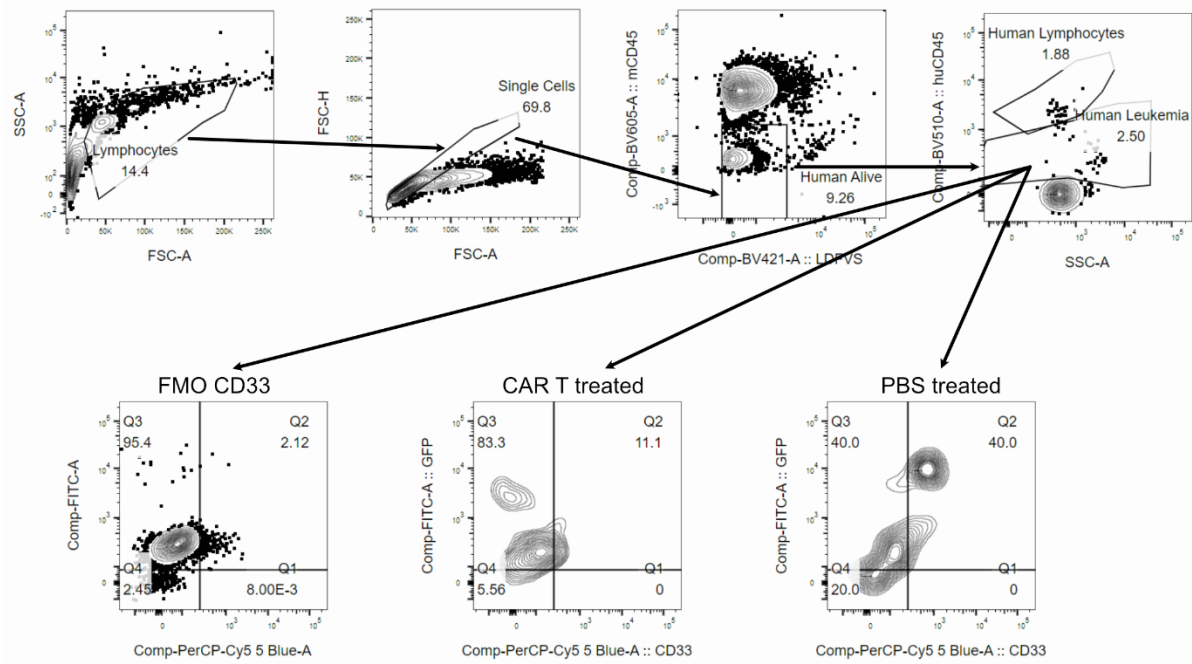

**Figure S9.**

**Gating strategy to identify CD33+ and CD33- cells in cells engrafted with human KG-1a cells.** Representative flow cytometry plot of gating of non-mouse cells by exclusion of mouse CD45+ cells, with human lymphocytes and human leukemia identified by expression of human CD45. Three representative plots from FMO stained and PBS-treated, CAR T-treated and PBS-treated mice to show gating of GFP versus CD33.

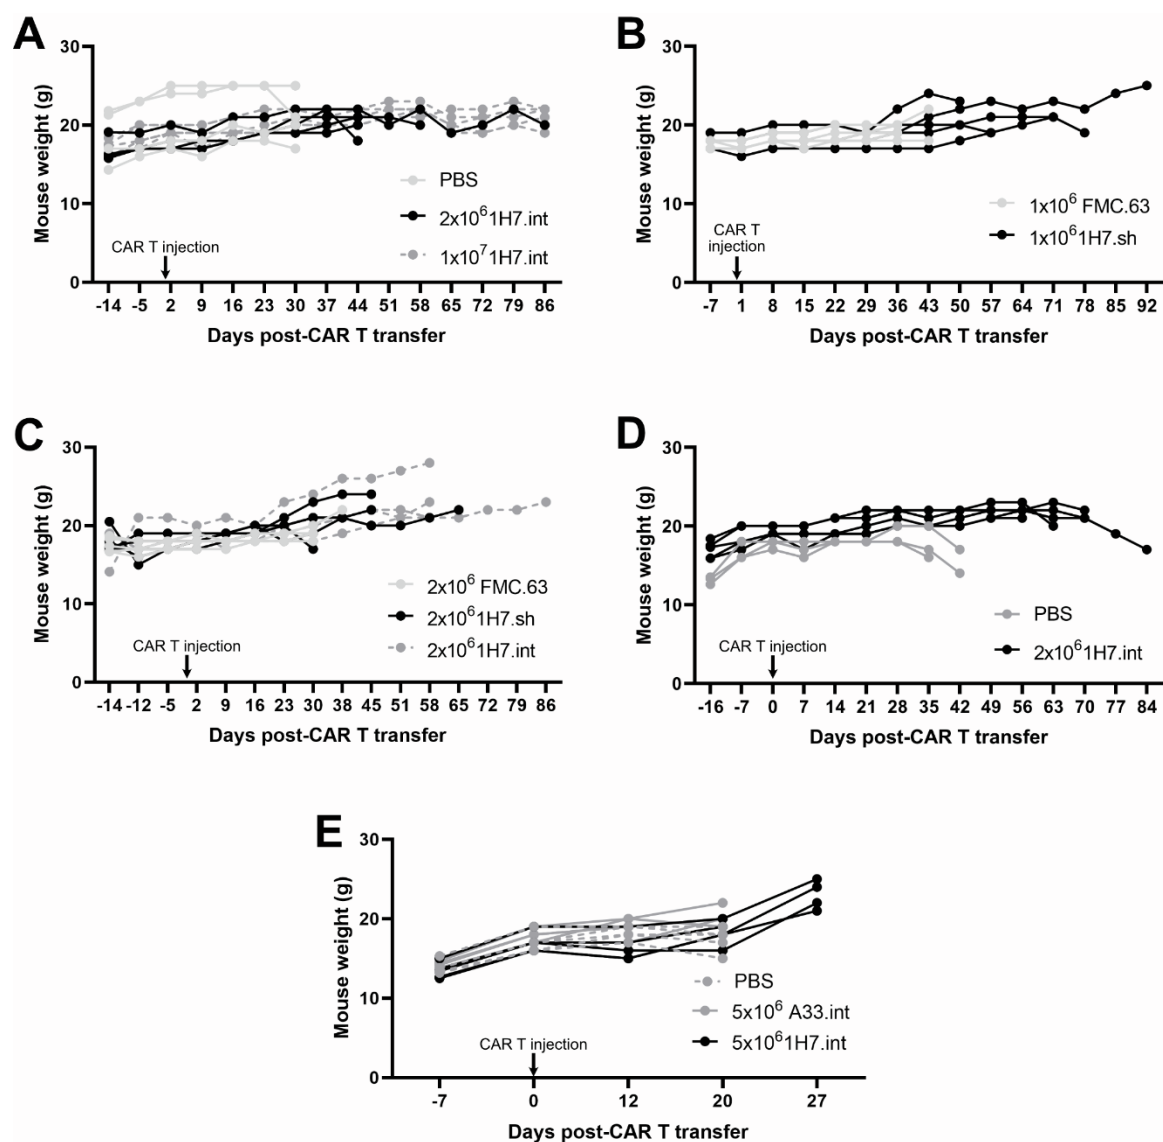

**Figure S10.**

Individual weights of mice bearing human AML cell line derived xenografts following treatment with 1H7 CAR T cells, A33 CAR T cells, control FMC.63 (CD19) CAR T cells, or PBS. Immunodeficient NSG mice were injected with GFP-expressing  $2 \times 10^6$  HL-60 (A),  $1 \times 10^6$  HL-60 (B),  $2 \times 10^6$  HL-60 (C),  $2 \times 10^6$  KG-1a (D) or  $5 \times 10^5$  MOLM-14 cells (E). Two weeks (A,C and D) or one week (B and E) later, mice received either 1H7 CD33<sup>PAN</sup> CAR T cells with an intermediate (int) or short (sh) spacer (n=5), A33 CAR T cells (n=5) or CD19-directed CAR T (FMC63, n=5) in a 1:1 ratio of CD4:CD8 T cells or were given vehicle control (PBS, n=4 for HL-60, n=3 for KG-1a, n=5 for MOLM-14). Mice were monitored weekly for weight. Note: animals that were deemed unwell were weighed more regularly.

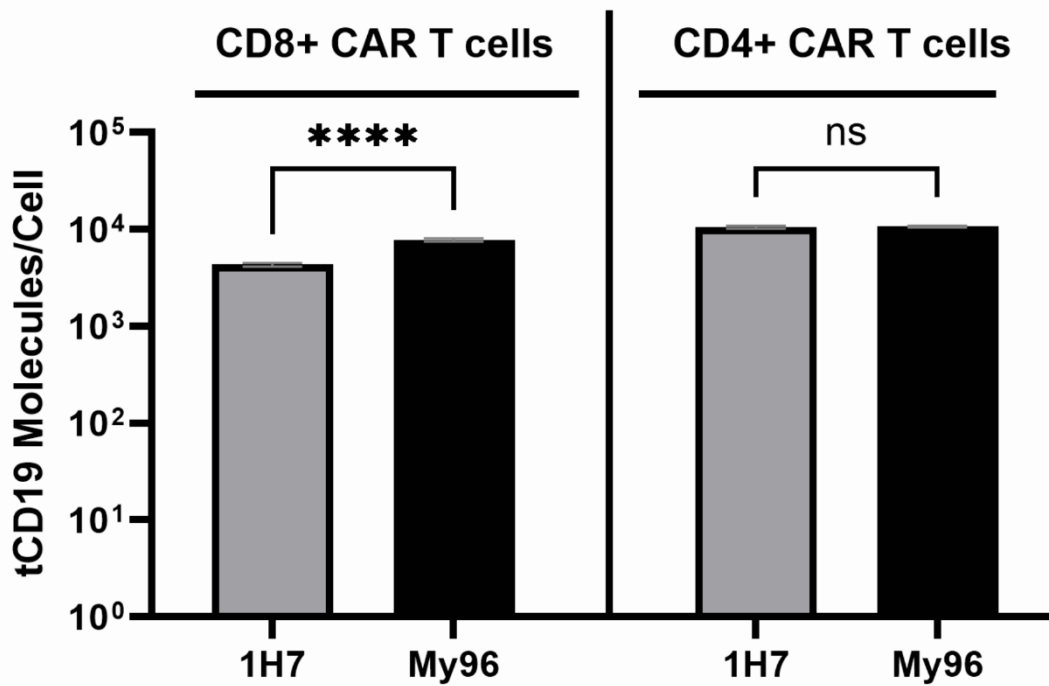

**Figure S11.**

Expression of the CAR transduction marker, truncated CD19 (tCD19), on My96 and 1H7 CAR T cells. Expression of tCD19 molecules was assessed by Quantibrite-PE analysis on CD8+ and CD4+ CAR T cells. \*\*\*\* $P < 0.0001$ , ns (not significant) by one-way ANOVA analysis with post-hoc Tukey test.

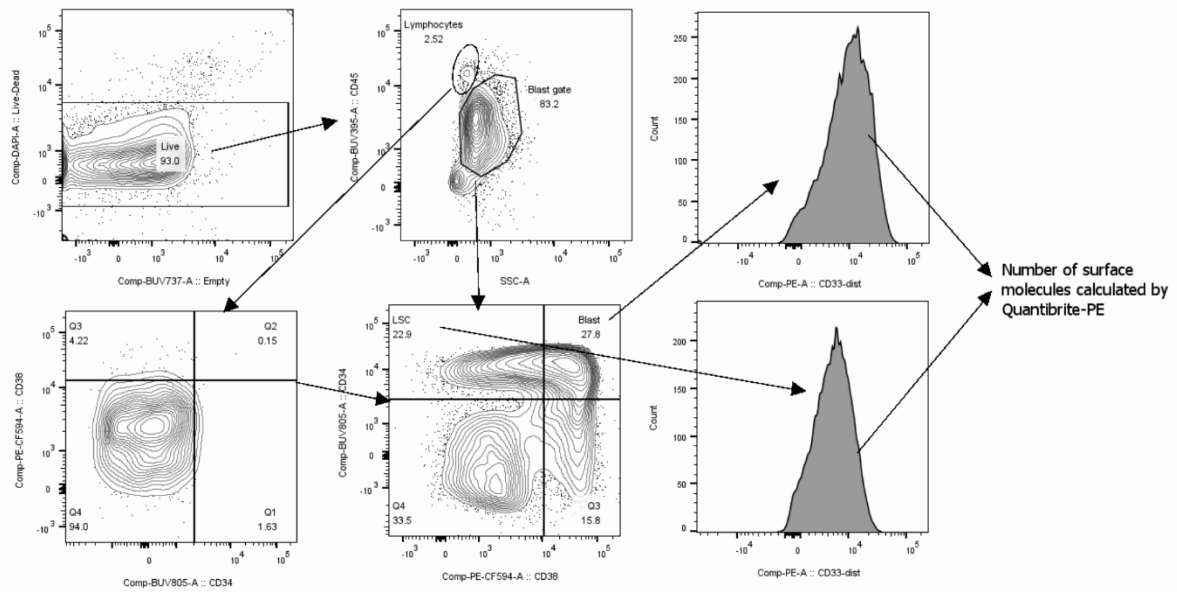

**Figure S12.**

**Gating strategy to identify CD34+ and CD38+ leukemic cells.** Representative flow cytometry plot from a bone marrow aspirate of a patient with relapsed/refractory AML showing live cells, and then gating of blasts and lymphocytes based on CD45 vs SSC. Cut-off of CD34 and CD38 based on lymphocyte expression as per Hulsphas et al. *Cytometry B Clin Cytom* 2009;76(6):355-364 (PMID: 19575390).
